# Supplementary material for: A genetic memory initiates the epigenetic loop necessary to preserve centromere position
Source: PubMed Central journal article supplement — EMBO J. 2020 Sep 18;39(20):e105505. doi: 10.15252/embj.2020105505 (PMC7560200; doi:10.15252/embj.2020105505), 2020-09-18
Supplement: EMBJ-39-e105505-s001.pdf [file EMBJ-39-e105505-s001.pdf]

## **Appendix:**

**Hoffmann et al, "A genetic memory initiates the epigenetic loop necessary to preserve centromere position"**

### **Table of Contents**

Appendix Figure S1 (**related to Fig. 4**)

Appendix Figure S2 (**related to Fig. 5**)

Appendix Figure S3 (**related to Fig. 6**)

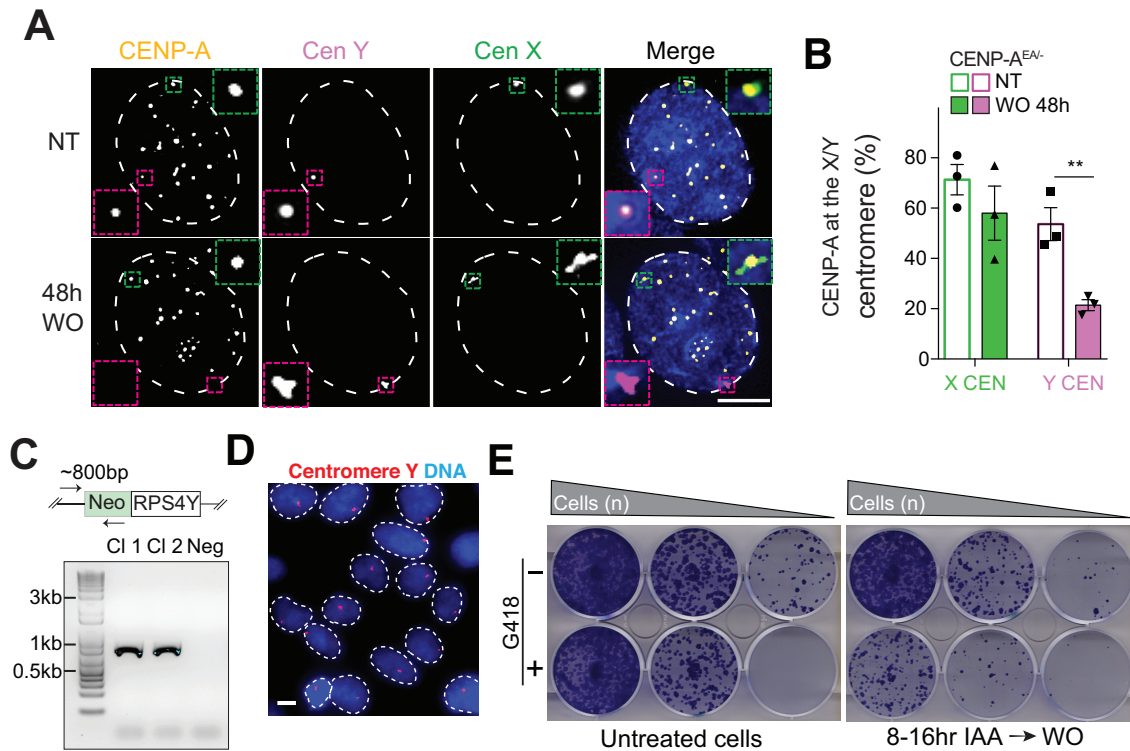

**Appendix Figure S1 (related to Fig. 4). Impaired centromere formation at the Y chromosome after a CENP-A<sup>OFF/ON</sup> cycle.**

(A) Representative IF-FISH images on interphase cells (nucleus highlighted by a white dashed line) showing *de novo* CENP-A deposition at the X but not at the Y centromere after a CENP-A<sup>OFF/ON</sup> cycle (48 h after IAA wash-out (WO)). Scale bar, 5  $\mu$ m.

(B) Bar plot showing frequency of CENP-A presence at the X (green) or Y (magenta) centromere in non-treated cells or following one CENP-A<sup>OFF/ON</sup> cycle. Unpaired t test, \*\*p=0.0096. Error bars represent SEM of 3 independent experiments.

(C) Agarose gel of a PCR run confirming successful integration of the Neomycin resistance cassette at the Y chromosome of DLD-1 cells.

(D) Representative FISH using a Y centromere probe in Neomycin selected DLD-1 cells (nuclei are highlighted by white dashed contour lines). Scale bar, 5  $\mu$ m.

(E) Colony formation assay under selective pressure (Neomycin, G418) in untreated conditions or following a CENP-A<sup>OFF/ON</sup> cycle.

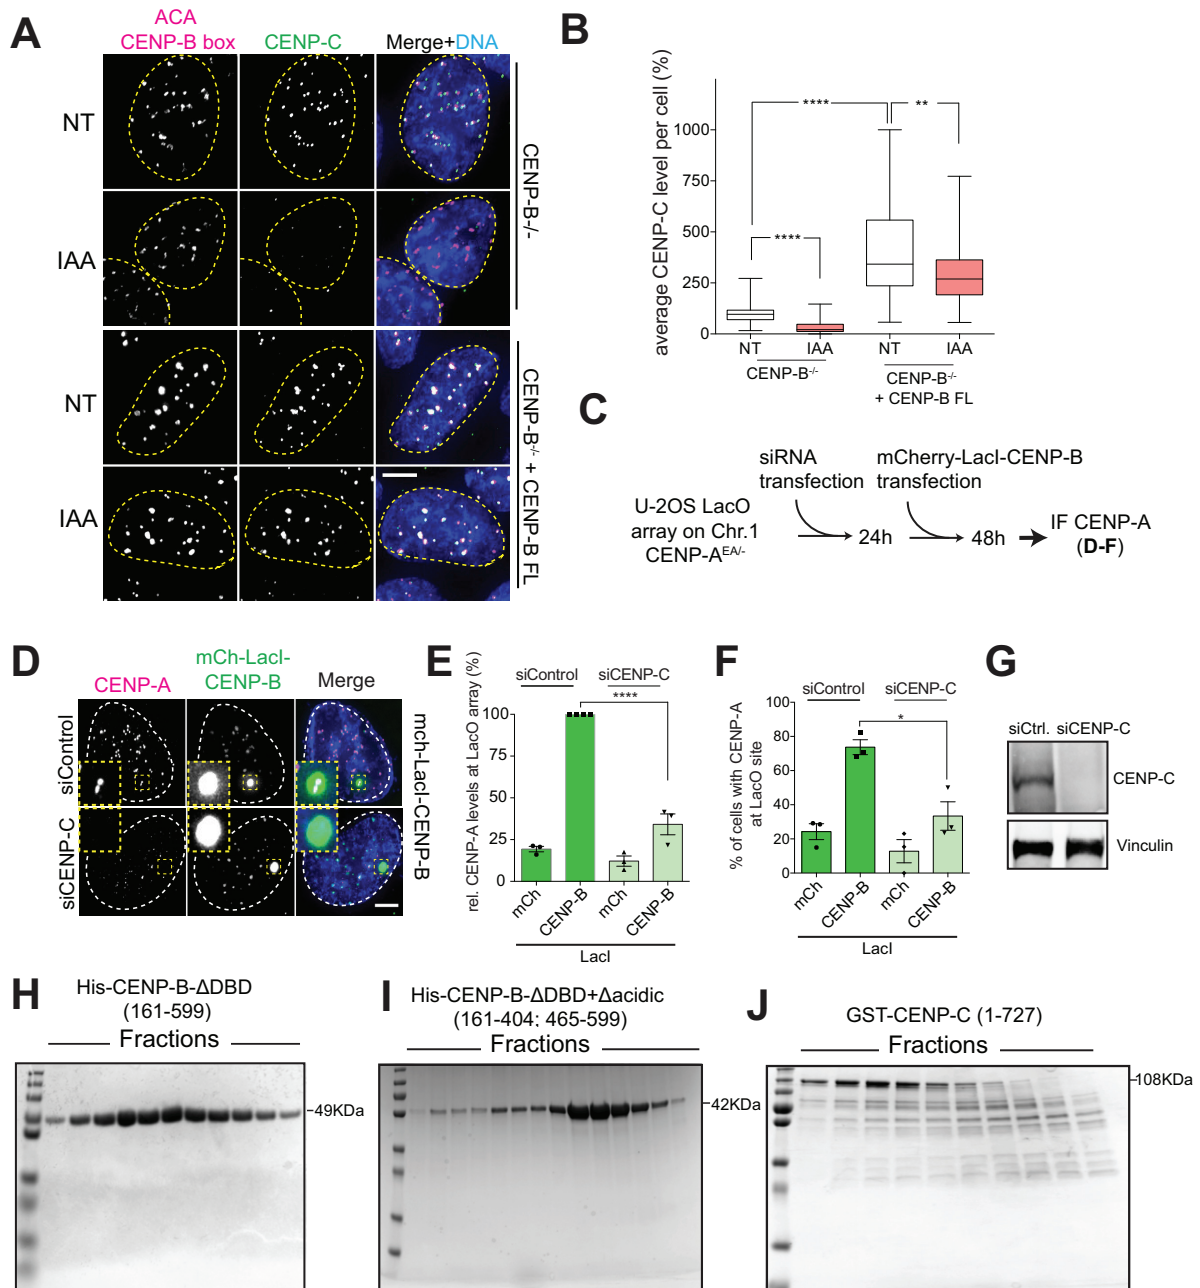

**Appendix Figure S2 (related to Fig. 5). CENP-C is required for the recruitment of CENP-A at ectopically tethered CENP-B loci.**

(A) Representative IF-FISH images of non-treated and IAA treated (48 h) CENP-B<sup>-/-</sup> +/- CENP-B<sup>FL</sup> rescue DLD-1 cells (nuclei are contoured by yellow dashed lines). Scale bar, 5 μm.

(B) Box plots of centromeric CENP-C levels in the indicated conditions (>70 centromeres per conditions). Box plot shows median and 25<sup>th</sup> and 75<sup>th</sup> percentiles, whiskers show minimum and maximum values. Unpaired t-test, \*\*\*\*p<0.0001, \*\*p=0.0049.

(C) Timeline of experiments shown in D-G.

(D) Representative immunofluorescence images showing CENP-B (bait) mediated CENP-A (prey) recruitment in the indicated conditions. Nuclei are marked by white dashed contour lines. Inset shows LacO array. Scale bar, 5 $\mu$ m.

(E) Bar graph showing CENP-A intensities at the LacO array in the indicated conditions normalized to CENP-A intensities in siRNA control conditions at the mCherry-LacI-CENP-B-LacO array. Each dot represents one independent experiment (>20 cell analyzed for experiment). Unpaired t test, \*\*\*\*p<0.0001, error bars show SD of 3 independent experiments.

(F) Frequency of CENP-A recruitment to the LacO array in the indicated conditions. Each dot represents one independent experiment. Unpaired t test, \*p=0.0128, error bars show SD of 3 independent experiments.

(G) Immunoblot showing CENP-C knock-down after siRNA treatment.

(H-J) SDS PAGE analysis of fractions with an unique peak containing the protein of interest after a final purification step by size exclusion chromatography of the indicated constructs.

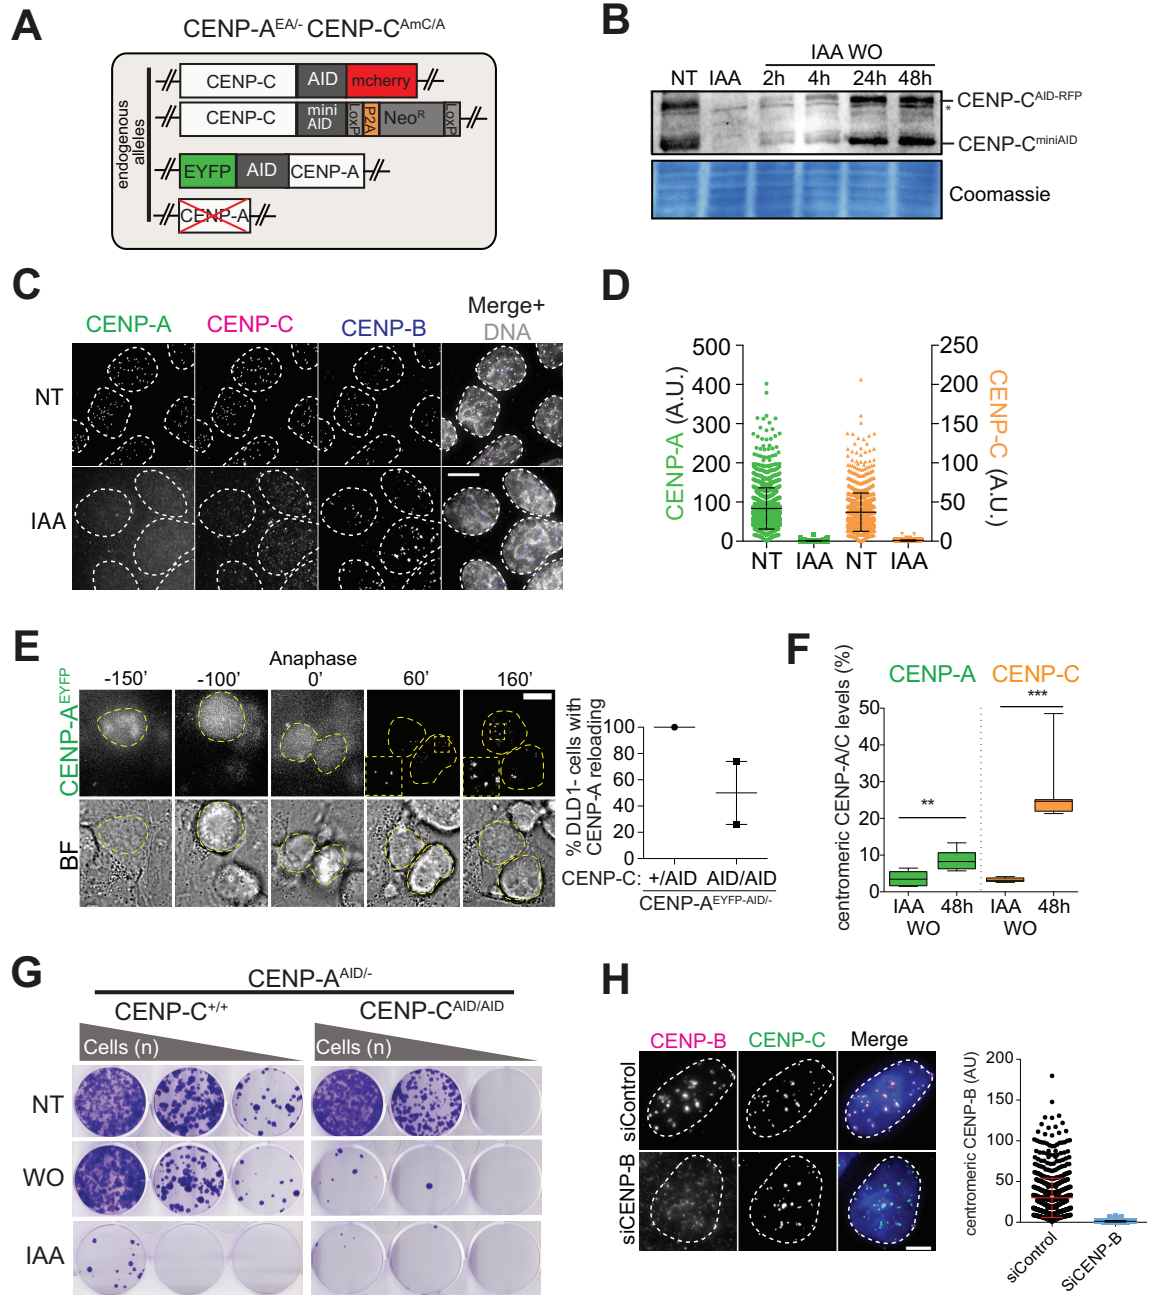

**Appendix Figure S3 (related to Fig. 6). Partial *de novo* CENP-A and CENP-C reloading at CENP-A/C-depleted centromeres is dependent on CENP-B.**

(A) Schematic representation of the genomic make-up of DLD-1 cells used for CENP-A/C<sup>OFF/ON</sup> assays.

(B) Immunoblot following CENP-C depletion and re-expression in DLD-1 cells using the AID system. Asterisk marks an unspecific band.

(C) Representative immunofluorescence images showing CENP-A and CENP-C depletion after IAA treatment. Nuclei are contoured by white dashed lines. Scale bar, 5  $\mu$ m.

**(D)** Quantification of centromeric CENP-A (green) and CENP-C (orange) level in the indicated conditions in cells with genomic make-up shown in A. Each dot represents one centromere. Error bars show SD.

**(E)** Left: stills of live cell imaging to monitor *de novo* CENP-A<sup>EA</sup> reloading in DLD-1 cells after one CENP-A/C<sup>OFF/ON</sup> cycle. Images were taken every 10 min. Nucleus/mitotic cell is highlighted by yellow dashed contour line based on bright field (BF) images. Scale bar, 10  $\mu$ m. Right: Plot to show the frequency of CENP-A reloading observed in cells that underwent mitosis. Each dot represents one experiment with at least 10 dividing cells. Error bars show SD of 2 independent experiments.

**(F)** Quantification of centromeric CENP-A (green) and CENP-C (orange) levels normalized to non-treated level using CENP-A/EYFP or CENP-C antibody. Box plot shows median and 25<sup>th</sup> and 75<sup>th</sup> percentiles, whiskers show minimum and maximum values. Average centromeric CENP-A/C intensities from five independent experiments (with at least 30 cells per condition) were used to generate the box plots. Unpaired t test: \*\*p=0.0048, \*\*\*p=0.0003.

**(G)** Colony formation assay to assess cell viability in the indicated conditions and cell lines.

**(H)** Left: representative immunofluorescence image showing CENP-B knock-down during a CENP-A/C<sup>OFF/ON</sup> assay. White dashed lines highlight nuclei. Scale bar, 5  $\mu$ m. Right: quantification of centromeric CENP-B level after RNAi treatment. Each dot represents one centromere (n>700 centromeres). Error bars show standard deviation.
