# Supplementary material for: A genetic memory initiates the epigenetic loop necessary to preserve centromere position
Source: PubMed Central journal article supplement — EMBO J. 2020 Sep 18;39(20):e105505. doi: 10.15252/embj.2020105505 (PMC7560200; doi:10.15252/embj.2020105505), 2020-09-18
Supplement: EMBJ-39-e105505-s002.pdf [file EMBJ-39-e105505-s002.pdf]

## Expanded View Figures

### Figure EV1. (related to Fig 1). *De novo* CENP-A reloading follows the canonical CENP-A deposition pathway.

- A Image of IAA-treated cells. IAA escaper is highlighted with a dashed yellow circle, and CENP-A depleted cells are contoured with red dashed lines. Scale bar, 10  $\mu$ m.
- B Schematic for the experiments shown in C.
- C Quantification of centromeric CENP-A levels normalized to non-treated level. Each dot represents one experiment, and error bars represent SD. Unpaired *t*-test: \**P* = 0.0493.
- D Quantification of the relative number of DLD-1 (square) and U-2OS (circle) cells with centromeric CENP-A at the indicated timing of IAA treatment and recovery. Each dot represents one experiment with at least 20 cells per condition. Error bars represent standard deviation (SD) from 3 independent experiments.
- E Schematic for the experiments shown in F-H.
- F Left panel: representative images to confirm M18BP1 knock-down in late M phase cells. Scale bar, 10  $\mu$ m. Yellow dashed lines highlight nuclei of daughter cells. Right panel: relative M18BP1 levels in late M/early G1 phase after siRNA knock-down using M18BP1 antibody. Each dot represents one centromere, and error bars represent standard deviation.
- G Representative images of *de novo* CENP-A reloading upon M18BP1 knock-down. Nuclei are highlighted with white dashed lines. Scale bar, 5  $\mu$ m.
- H Quantification of centromeric CENP-A intensities in the indicated conditions (relative intensities normalized to CENP-A level in untreated cells). Each dot represents one experiment (> 30 cells per condition per experiment), and error bars represent SD of 2 independent experiments.
- I Schematic representation for the experiments shown in J-K.
- J Bar graphs showing quantification of centromeric CENP-A intensities following the indicated treatment. Each dot represents one experiment with at least 30 cells. Error bars represent SD of 2 independent experiments.
- K Immunoblot of total protein levels in the indicated cell lines and conditions.

Source data are available online for this figure.

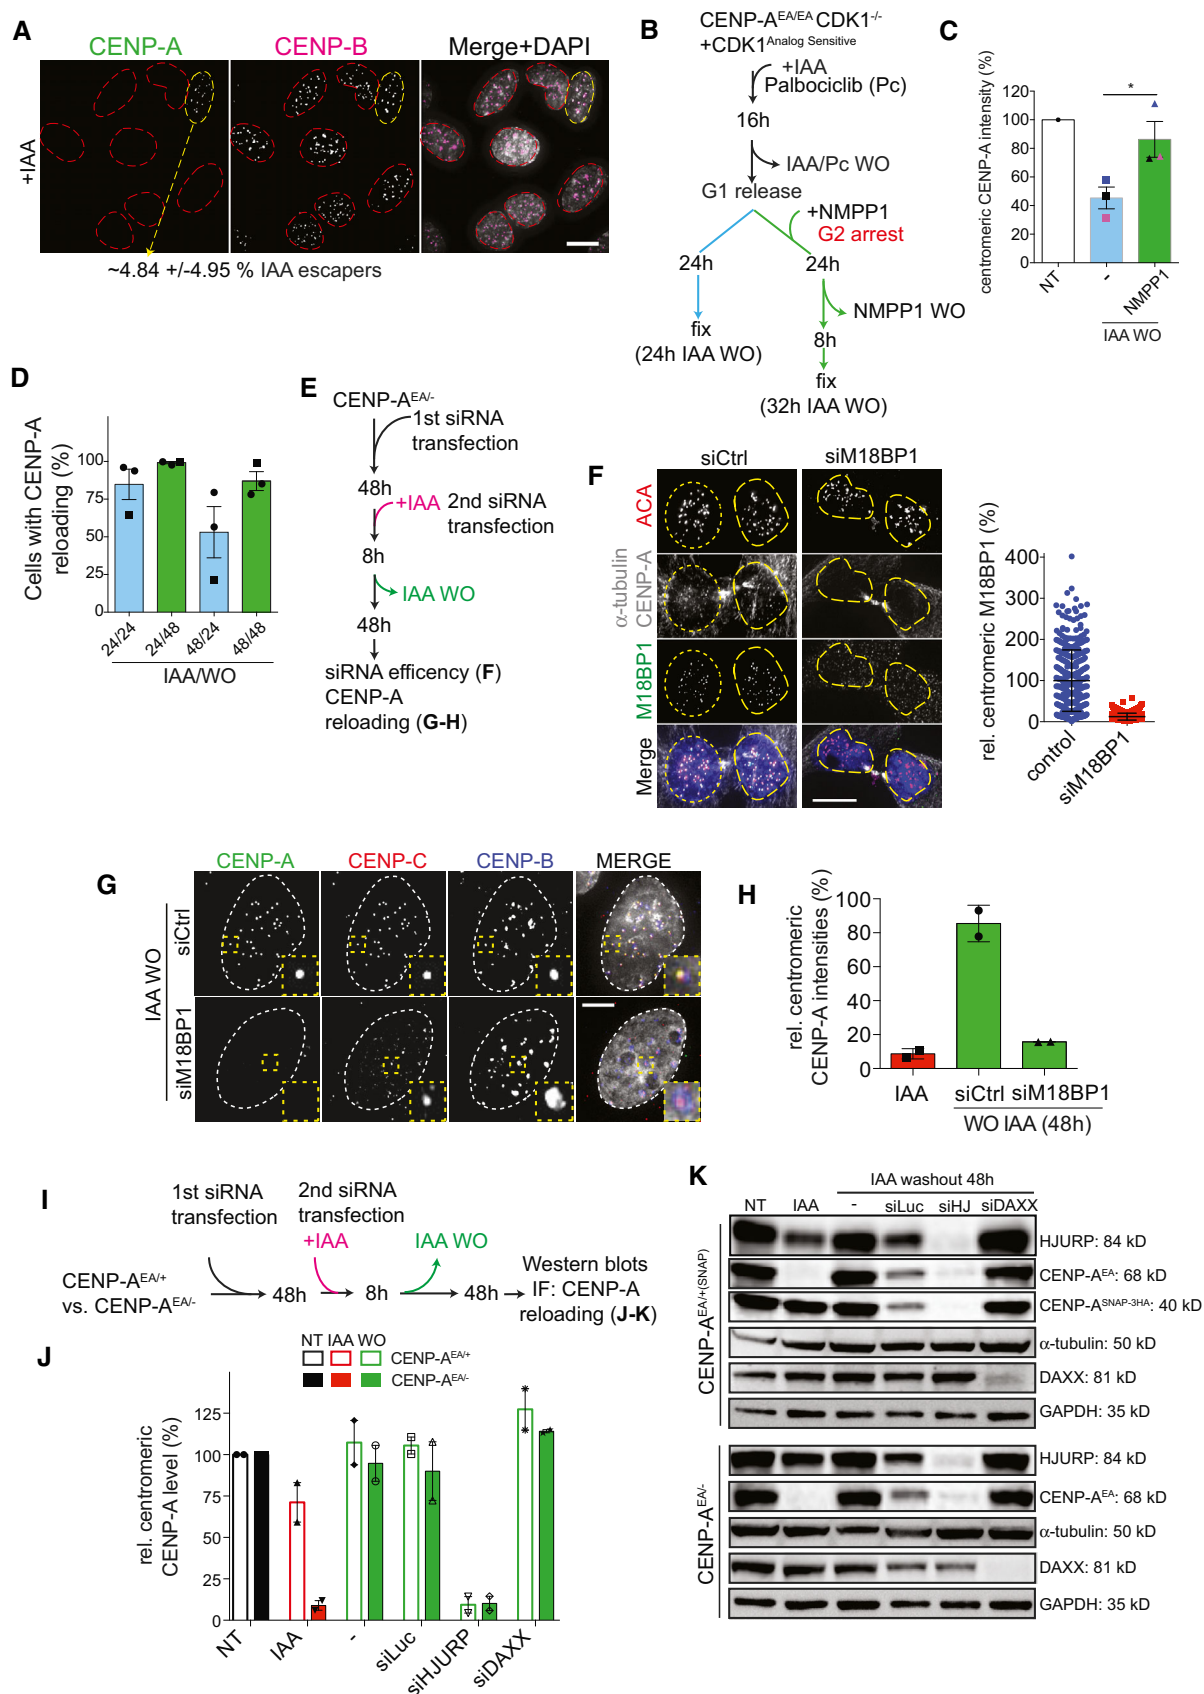

Figure EV1.

**Figure EV2. (related to Fig 2). Complete centromeric CENP-A<sup>EA</sup> depletion with the AID system.**

- A Schematic illustration of experiment shown in B, C.
- B Representative images showing complete depletion of CENP-A<sup>EA</sup> despite doxycycline (DOX)-induced overexpression in DLD-1 cells. Nuclei are contoured with white dashed lines. Scale bar, 5  $\mu$ m.
- C Quantification of CENP-A intensities in the nucleus and at the centromere in the presence or absence of IAA/DOX. Endogenous (End.) CENP-A<sup>EYFP-AID</sup> (CA) or overexpressed (OE) CA is depleted to non-detectable background-level in the presence of IAA. Each dot represents a cell. Mean CA intensities are indicated by a black line.
- D Schematic illustration of the single molecule microscopy (SMM) experiments shown in E, G.
- E Representative microscopy images from live cell imaging and corresponding 3D surface plots showing single molecule GR<sup>EYFP</sup> detection in I and following IAA treatment CENP-A<sup>EA</sup> signal absence at CENP-B<sup>mcherry</sup> marked centromeres in II, using SMM acquisition settings.
- F Examples of background-corrected EYFP signal intensities quantified over time (as shown in D) for single GR<sup>EYFP</sup> molecules (in magenta), centromeric EYFP signals in IAA-treated CENP-A<sup>EA/EA</sup> cells (in green), and in the absence of EYFP molecules (in black).
- G Signal quantification as shown in D in the indicated conditions. Unpaired t-test, ns ( $P = 0.88$ ), \*\*\*\* $P < 0.0001$ , error bars represent standard deviation. Each dot represents the quantification of one GR<sup>EYFP</sup> signal (GR<sup>EYFP</sup>,  $n = 13$ ) or one centromere, respectively (No EYFP CENP-C<sup>mcherry</sup>,  $n = 85$  and CENP-B<sup>mcherry</sup> CENP-A<sup>EA</sup>,  $n = 52$ ).
- H CENP-A levels at the indicated HOR arrays quantified by CUT&RUN sequencing. CENP-A levels 48 h after IAA wash-out recover at the original HOR.
- I Quantifications of CENP-A occupancy at the DXZ1 HOR array after one CENP-A<sup>OFF/ON</sup> cycle in DLD-1 cells using IF-FISH on chromatin fibers. Each dot represents a single chromatin fiber. Error bars show standard deviation.  $P$ -values from unpaired t-test.
- J Line scan analysis at the D7Z1 array on chromosome spreads in the indicated treatment. Scale bar, 2  $\mu$ m.

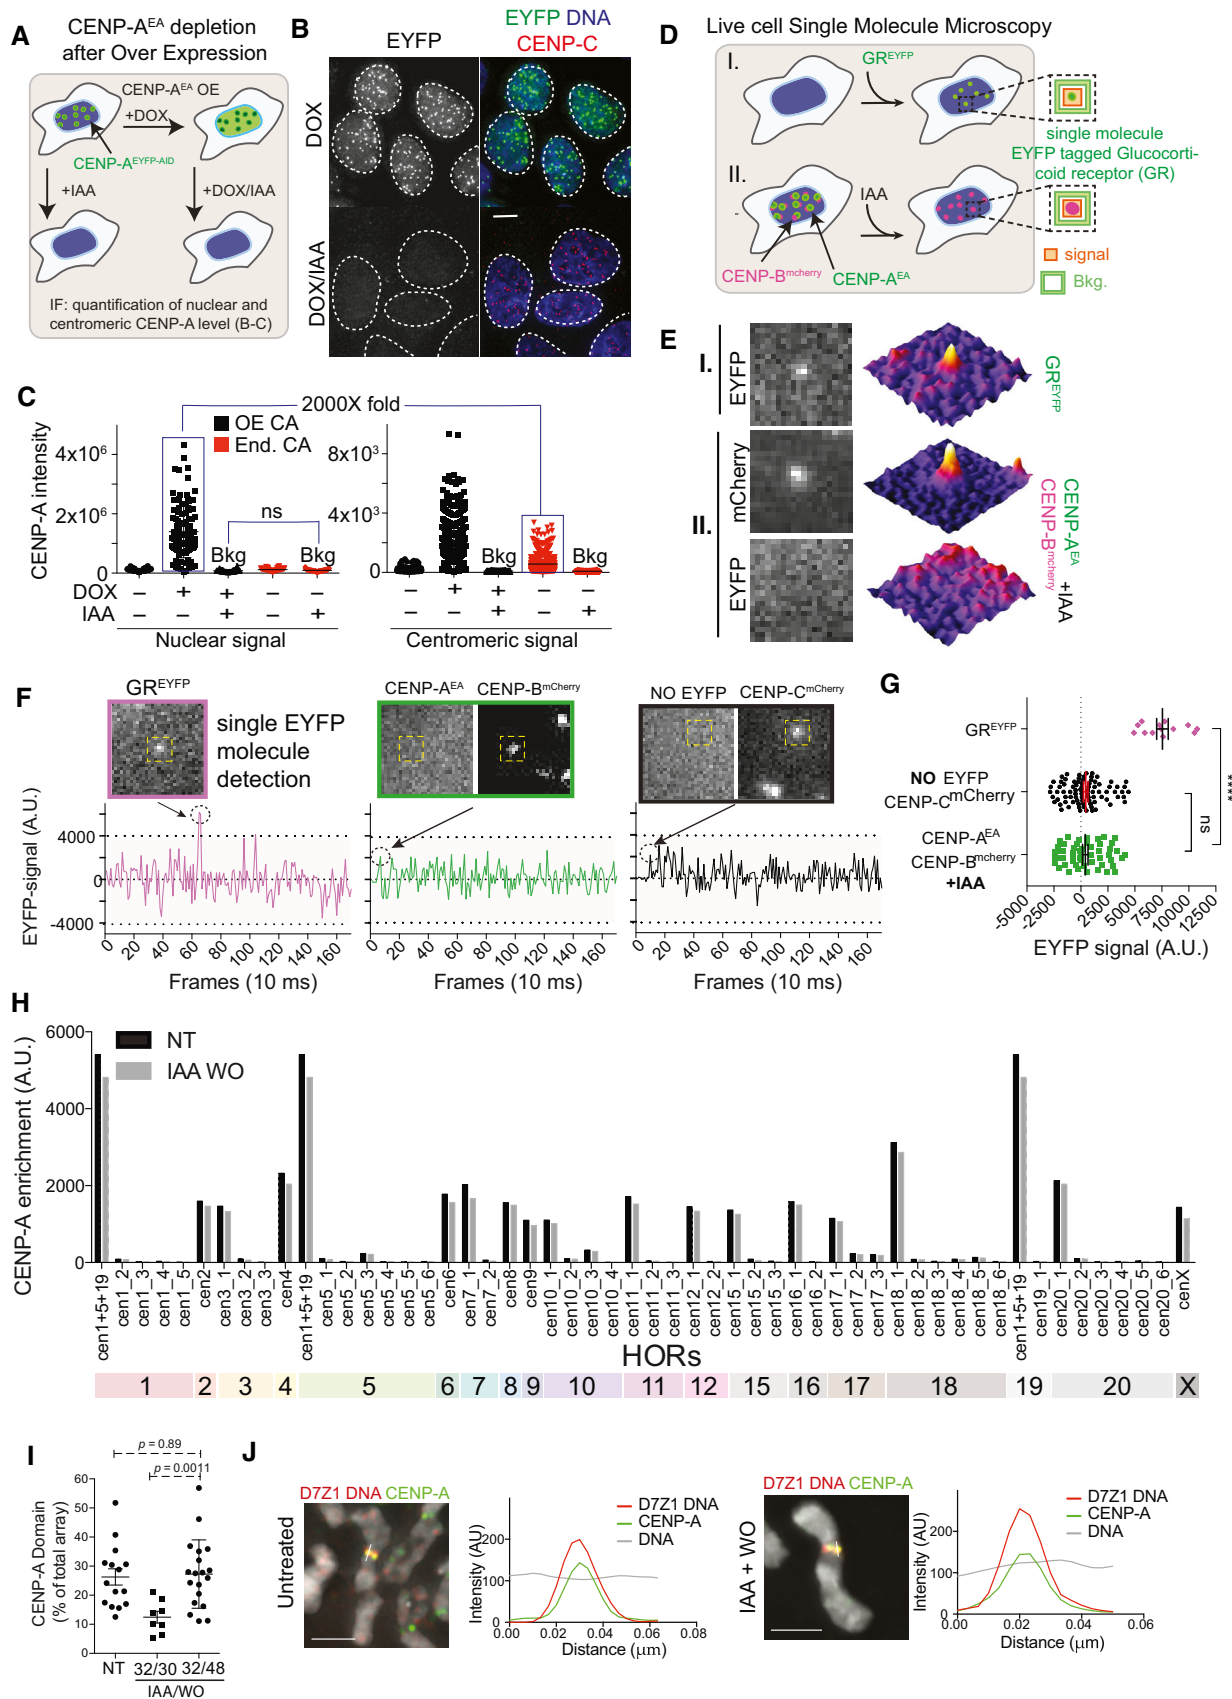

Figure EV2.

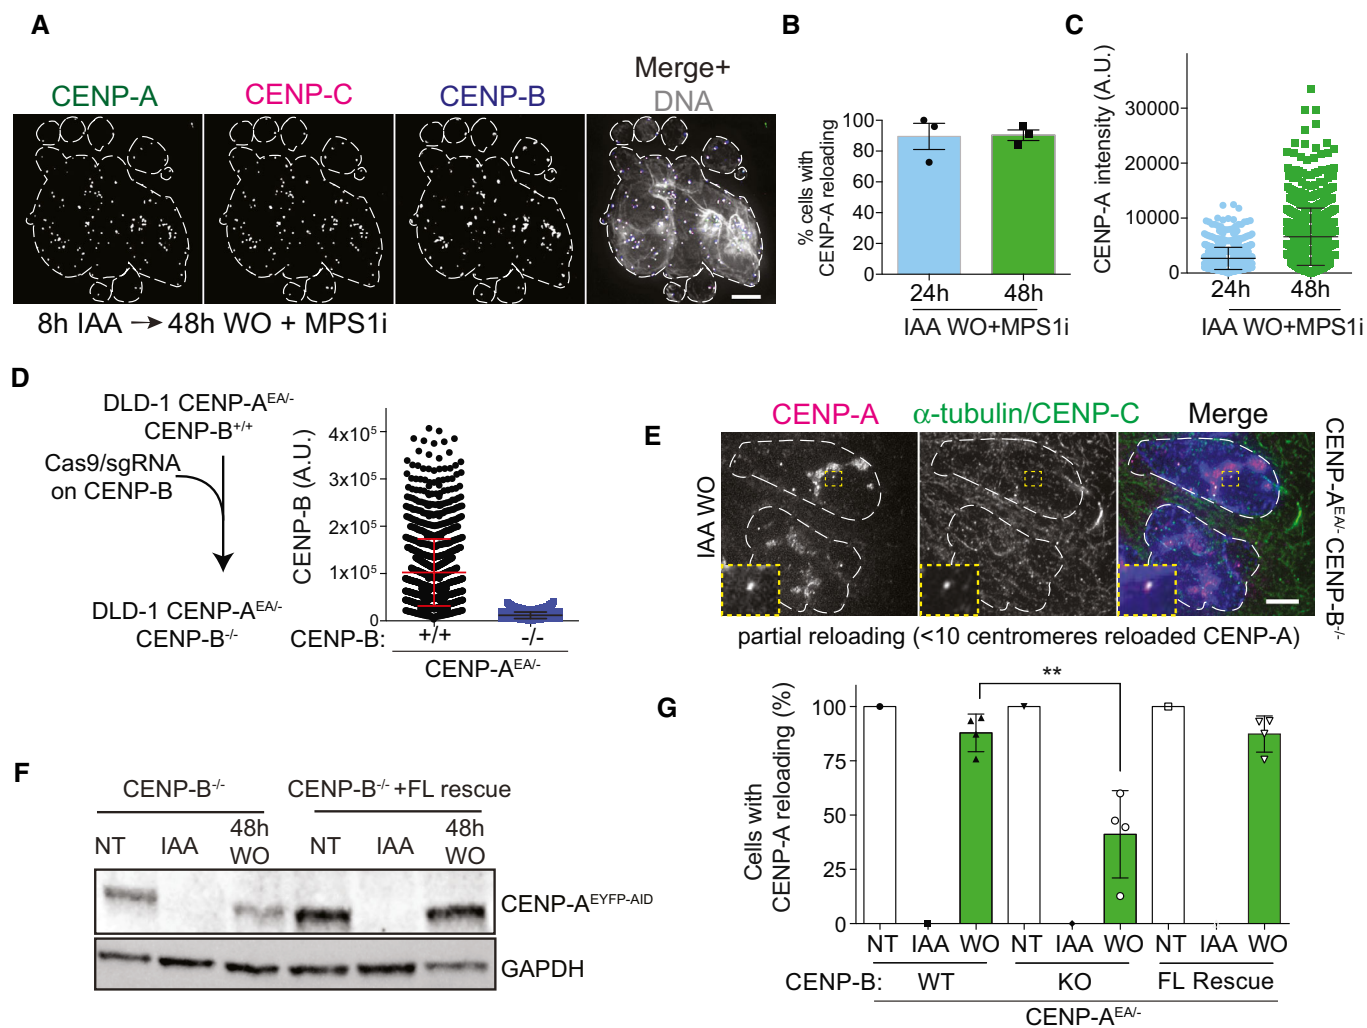

**Figure EV3. (related to Fig 3). CENP-B is a key factor for efficient *de novo* CENP-A reloading.**

- A** Representative immunofluorescence showing *de novo* CENP-A deposition in CENP-B (+/+) DLD-1 cells after reversine-induced chromosome mis-segregation. DAPI staining is contoured by a white dashed line. Scale bar, 5  $\mu$ m.
- B, C** Bar graphs showing the relative number of CENP-A-positive cells (B) and the level of centromeric CENP-A level (C) in the presence of reversine. Each dot represents one experiment with more than 20 cells per condition. Error bars represent SD of 3 independent experiments.
- D** Left: schematic of the CRISPR/Cas9 strategy to deplete CENP-B in DLD-1 cells as measured in the dot plot on the right. Each dot represents one centromere, and error bars show standard deviation.
- E** Immunofluorescence images showing partial *de novo* CENP-A<sup>EA</sup> reloading (< 10 centromeres) in CENP-B<sup>-/-</sup> DLD-1 cells in late M phase. Nuclei of daughter cells are highlighted with white dashed lines. Scale bar, 5  $\mu$ m.
- F** Immunoblot of total protein levels in the indicated conditions in the indicated cell line. FL = full length.
- G** Bar graphs showing the relative number of DLD-1 cells with centromeric CENP-A in indicated conditions in the indicated cell line. Each dot represents one single experiment, > 30 cells per condition. Unpaired *t*-test, \*\**P* = 0.0053, error bars represent SD of 4 independent experiments.

Source data are available online for this figure.

**Figure EV4. (related to Fig 7). Exogenously expressed CENP-C, but not CENP-A, reloaded at the original centromere position in absence of endogenous CENP-A/C.**

- A Models of CENP-B-induced CENP-A reloading via (I.) initial Mis18 recruitment or (II.) initial CENP-C recruitment.
- B Schematic of the experiment analyzed in C, D.
- C Quantification of M18BP1 foci in late M phase/early G1 (eG1) in both daughter cells in the indicated conditions. Each dot represents two daughter cells. Error bars show SEM. Unpaired *t*-test: \*\*\*\**P* < 0.0001.
- D Representative immunofluorescence images showing M18BP1 foci in different cell lines after 24-h IAA treatment. Cells with centromeric CENP-A are marked with a red dashed contour line, while a yellow contour line marks cell without centromeric CENP-A. Scale bar, 5  $\mu$ m.
- E Illustration of the genomic make-up of DLD-1 cells used to test CENP-A or CENP-C reloading in the absence of endogenous CENP-A/C.
- F Immunoblot showing exogenous CENP-A (left) and CENP-C (right) expression upon addition of doxycycline (DOX) and TMP to induce CENP-A<sup>DHFR-mRFP</sup> or CENP-C<sup>DHFR-mRFP</sup> overexpression in DLD-1 cells.
- G Experimental design of experiments shown in Fig 7C–E and Appendix Fig S7H and I.
- H Bar graphs showing the control of CUT&RUN–qPCR on CENP-C antibody and primers binding to the centromere of chromosome 4 in the indicated conditions. Enrichment is measured relative to the IgG control and normalized to Alu repeats. Error bars represent SD of 3 independent experiments.
- I Representative immunofluorescence image showing 24 h CENP-A<sup>mRFP-DHFR</sup> stability in the absence of endogenous CENP-A and CENP-C in G1 arrested cells.
- J Experimental design of experiments shown in Fig 7F–H and Appendix Fig S7K–M.
- K Representative immunofluorescence image showing CENP-C reloading in interphase cells (nuclei are highlighted by a dashed red contour line) in the presence (control) or absence (sample) of endogenous CENP-A/C. Scale bar, 5  $\mu$ m.
- L Quantification of relative number of exogenous CENP-C-positive centromeres per cell in the indicated conditions quantified on chromosome spreads.
- M Bar graph showing the control of CUT&RUN–qPCR on CENP-A antibody and primers binding to the centromere of chromosome 4 in the indicated conditions. Enrichment is measured relative to the IgG control and normalized to Alu repeats.

Source data are available online for this figure.

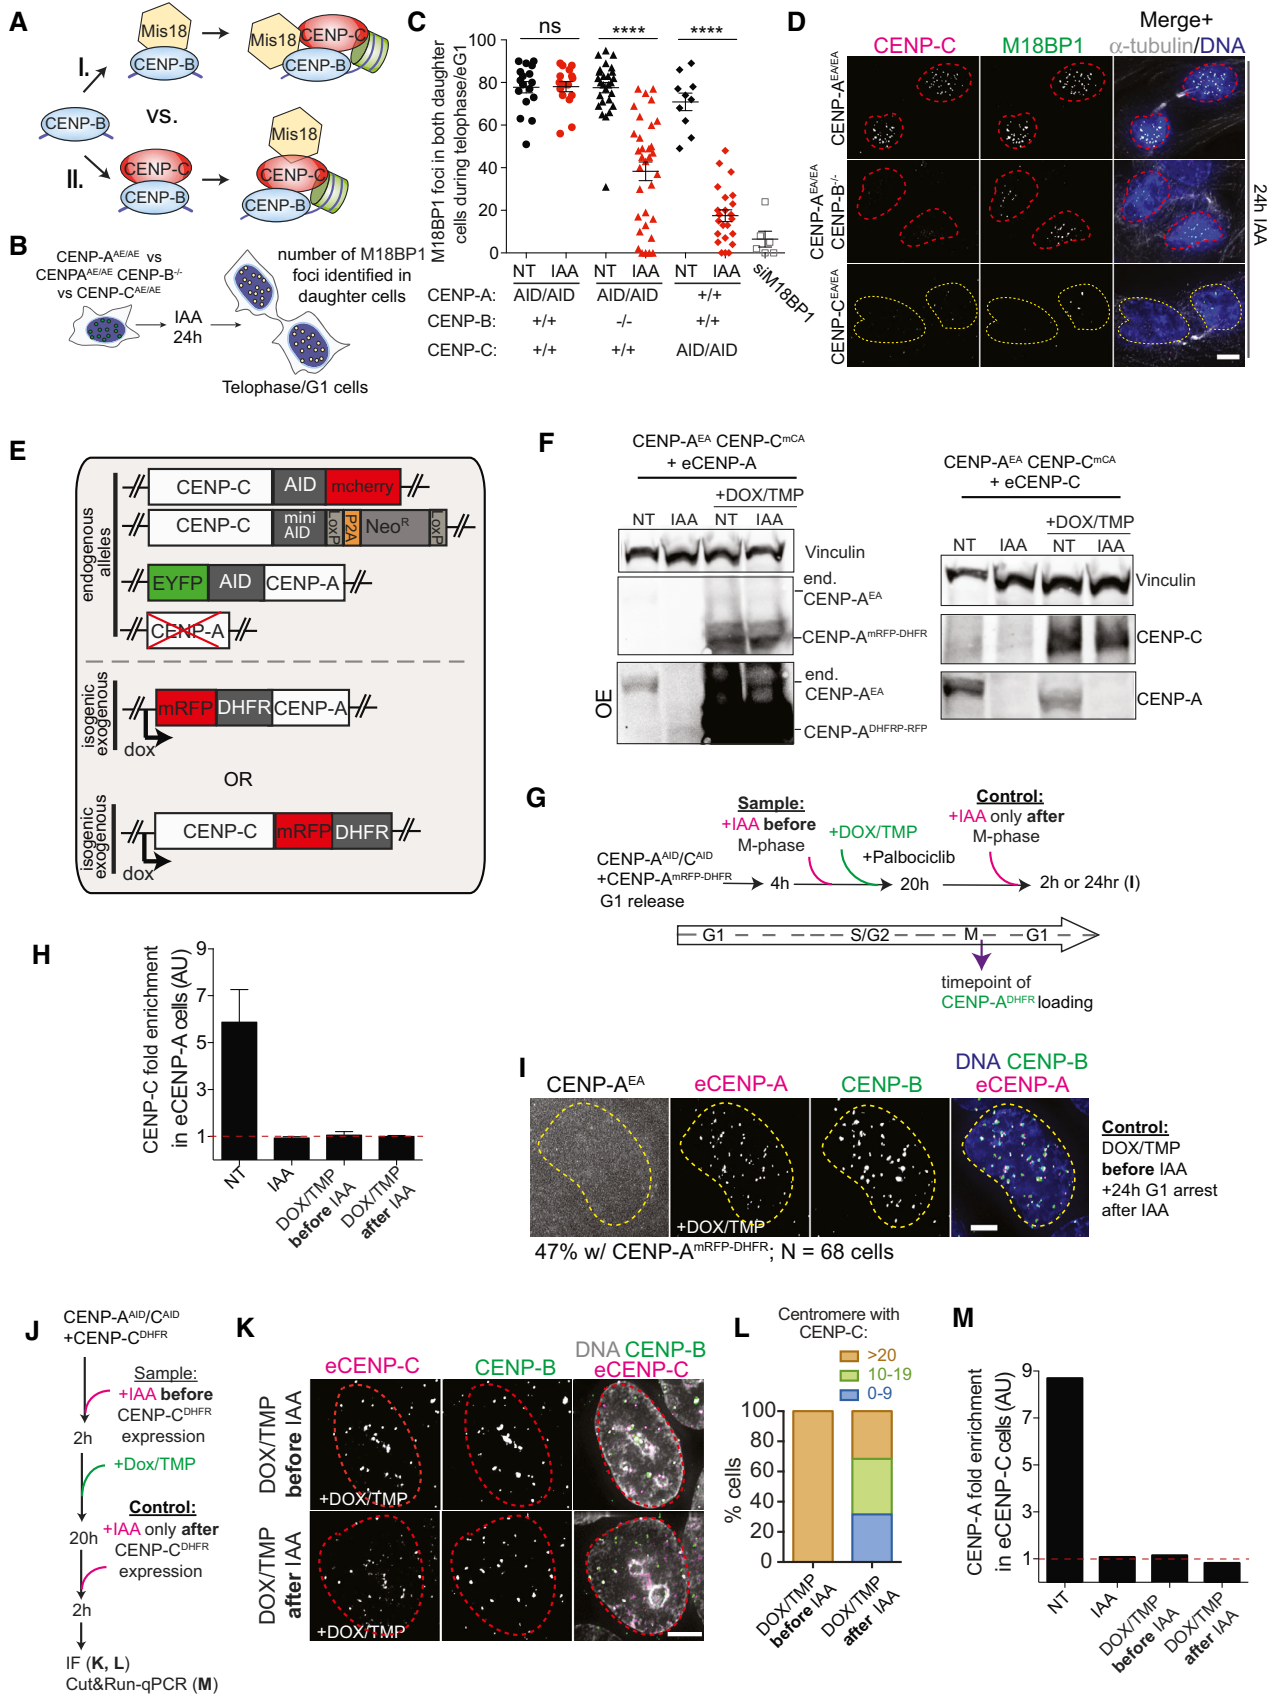

Figure EV4.



**Figure EV5. (related to Fig 8). CENP-A-deprived CD4<sup>+</sup> T cells are found in human blood samples but disappear upon T-cell activation.**

- A Representative FACS plots showing the efficiency of total CD4<sup>+</sup> T-cell purification from human blood PBMCs.
- B Representative FACS plots showing gating of CENP-B-positive/CENP-A-high and CENP-B-positive/CENP-A-low populations of freshly purified human CD4<sup>+</sup> T cells based on isotype controls. Ms = mouse; Rb = rabbit.
- C Graph showing CENP-A foci identified in high or low CENP-A expressing cell colocalizing with CENP-B foci in two donors. Each dot represents the percentage of CENP-A/B colocalizing in one cell. Error bar shows SEM.
- D Quantification of centromeric CENP-A level in high or low CENP-A expressing CD4<sup>+</sup> T cells. Each dot represents one centromere. Error bars show standard deviation.
- E Representative immunofluorescence images showing CENP-B- and CENP-C-positive centromeres, but lacking CENP-A in a CD4<sup>+</sup> T cell. Nucleus is contoured by a dashed yellow line. Scale bar, 5  $\mu$ m
- F Representative plots showing CENP-A expression vs. forward scatter area (FSC-A), which determines the relative size of CD4<sup>+</sup> T cells after activation. Gates represent the frequency of CENP-A high and low populations in total CD4<sup>+</sup> T (shaded gates represent CENP-A<sup>low</sup> cells).
- G Graph representing the absolute number of CFSE-high/CENP-A-low CD4<sup>+</sup> T cells during the experimental kinetics. One-way ANOVA, multiple comparisons,  $n = 6$  (each symbol represents a different donor). \*\* $P < 0.01$ , \*\*\* $P < 0.001$ .
- H Graph showing the frequency of dead cells in CD4<sup>+</sup> T cell cultures over time. One-way ANOVA, multiple comparisons,  $n = 6$  (each symbol represents a different donor). Error bars show SEM. \* $P < 0.05$
- I CFSE dilution and CENP-A expression at day 3 post-activation. Representative FACS plots showing CENP-A expression in CD4<sup>+</sup> T cells that have not divided (div 0) and those that have divided once or more times (div  $\geq 1$ ), gated based on CFSE dilution. Gates in CENP-A plots were set based on isotype control for each specific population (cells in shaded gates are CENP-A-low CD4<sup>+</sup> T cells).
- J Graph representing the frequency of CENP-A low cells (shaded gate in I). One-way ANOVA, multiple comparisons,  $n = 6$  (each symbol represents a different donor). Error bars show SEM. \*\*\*\* $P < 0.0001$ .
- K Representative immunofluorescence images showing CENP-A, CENP-C, and CD4 staining after FACS. Cells with centromeric CENP-A are marked with a red dashed contour line, while a yellow contour line marks cell without centromeric CENP-A. Scale bar, 5  $\mu$ m.



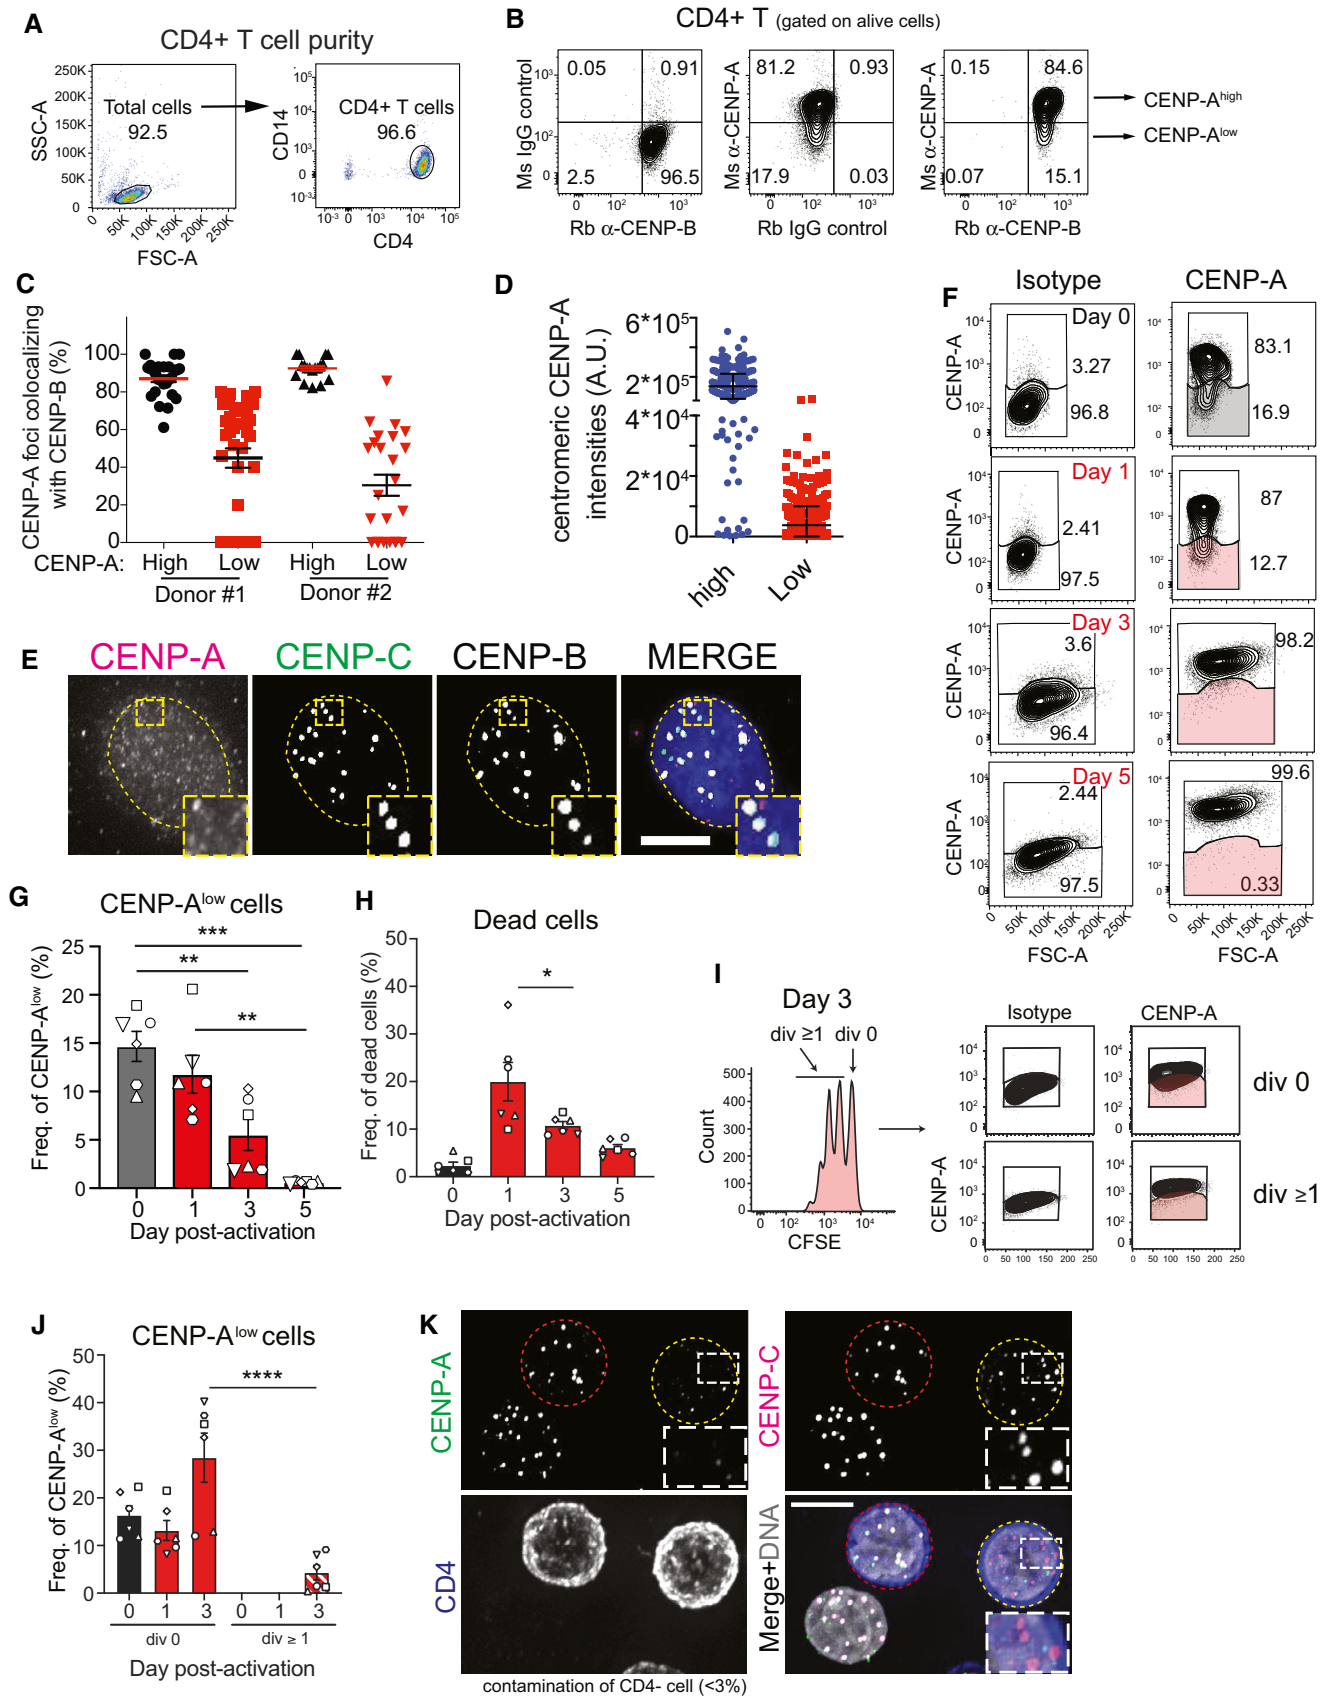

Figure EV5.
