# Supplementary figures and images for: A genetic memory initiates the epigenetic loop necessary to preserve centromere position
Source: PubMed Central journal article supplement — EMBO J. 2020 Sep 18;39(20):e105505. doi: 10.15252/embj.2020105505 (PMC7560200; doi:10.15252/embj.2020105505), 2020-09-18

Figure 1 B

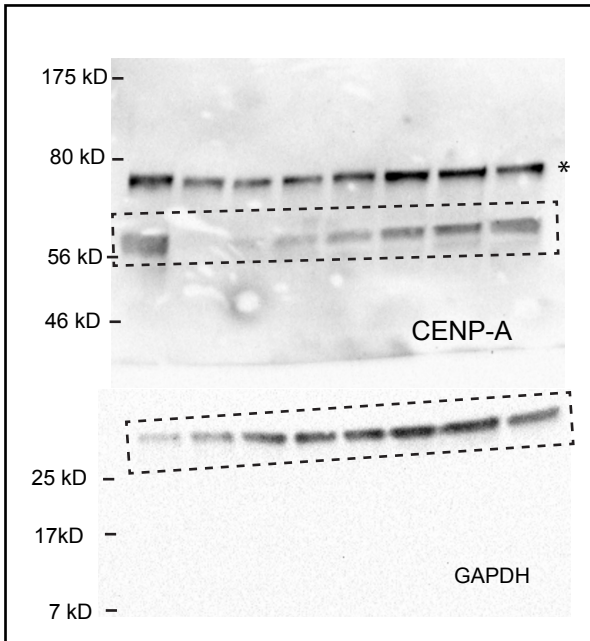

Supplement: EMBJ-39-e105505-s006.pdf [file EMBJ-39-e105505-s006.pdf]

figure 5G

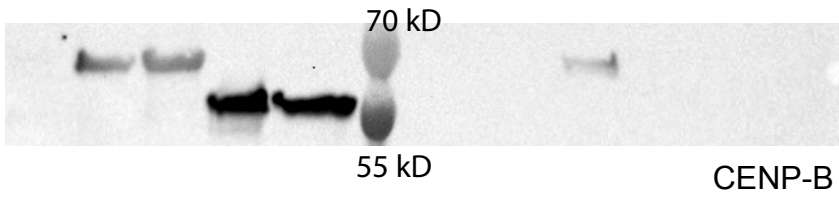

Supplement: EMBJ-39-e105505-s007.pdf [file EMBJ-39-e105505-s007.pdf]
